# Supplementary material for: Three-Dimensional Calcium Alginate Hydrogel Assembly via TiOPc-Based Light-Induced Controllable Electrodeposition
Source: MDPI journal article supplement (doi:10.3390/mi8060192), 2017-06-19
Supplement: s1 [file s1]

# Supplementary Materials: Three-Dimensional Calcium Alginate Hydrogel Assembly via TiOPc-Based Light-Induced Controllable Electrodeposition

Yang Liu, Cong Wu, Hok Sum Sam Lai, Yan Ting Liu, Wen Jung Li, Ya Jing Shen

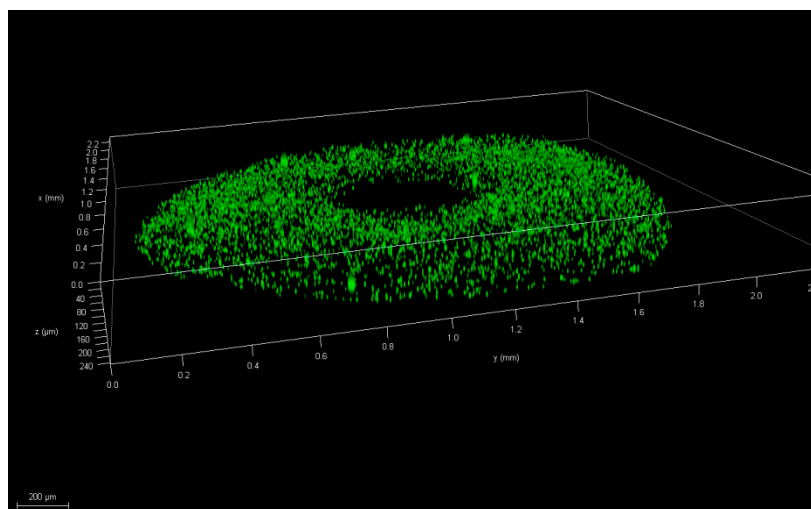

**Figure S1.** The confocal fluorescence image of the 3D hydrogel microstructure. The scale bar is 200  $\mu\text{m}$ .
